# Supplementary material for: Admission Hyperglycemia as a Predictor of Mortality in Acute Heart Failure: Comparison between the Diabetics and Non-Diabetics
Source: PubMed Central journal article supplement (PMC7019900; doi:10.3390/jcm9010149), 2020-01-06
Supplement: jcm-09-00149-s001.pdf [file jcm-09-00149-s001.pdf]

Supplementary Table. Comparison of baseline characteristics between DM and non-DM.

| Variables                                         | DM (n=2,125)    | Non-DM (n=3,416) | p      |
|---------------------------------------------------|-----------------|------------------|--------|
| Age (years)                                       | 70.4±11.4       | 67.4±15.9        | <0.001 |
| Male sex (n, %)                                   | 1157 (54.4)     | 1785 (52.3)      | 0.112  |
| Body mass index (kg/m <sup>2</sup> )              | 23.9±3.9        | 23.0±3.9         | <0.001 |
| Hypertension                                      | 1571 (73.9)     | 1709 (50.0)      | <0.001 |
| Diabetes mellitus history                         | 1961 (92.3)     | 0 (0.0)          | <0.001 |
| Dyslipidemia                                      | 1088 (55.5)     | 1081 (35.4)      | <0.001 |
| Heart failure history                             | 986 (46.4)      | 1422 (41.6)      | 0.001  |
| Smoking history                                   | 854 (40.2)      | 1286 (37.6)      | 0.059  |
| Alcohol history                                   | 780 (36.7)      | 1342 (39.3)      | 0.055  |
| Obesity                                           | 133 (6.3)       | 145 (4.3)        | 0.001  |
| Ischemic heart disease                            | 839 (39.5)      | 722 (21.1)       | <0.001 |
| Cerebrovascular disease                           | 392 (18.4)      | 448 (13.1)       | <0.001 |
| Chronic kidney disease                            | 471 (22.2)      | 323 (9.5)        | <0.001 |
| Chronic obstructive lung disease                  | 234 (11.0)      | 390 (11.4)       | 0.647  |
| Atrial fibrillation                               | 537 (25.3)      | 995 (29.1)       | 0.002  |
| Malignancy                                        | 154 (7.2)       | 300 (8.8)        | 0.043  |
| Systolic blood pressure (mmHg)                    | 134.3±30.8      | 129.2±29.8       | <0.001 |
| Diastolic blood pressure (mmHg)                   | 78.8±18.5       | 78.5±18.9        | 0.572  |
| Heart rate (bpm)                                  | 93.3±25.3       | 92.3±26.3        | 0.159  |
| Hb A1c (%)                                        | 7.3±1.4         | 5.8±0.4          | <0.001 |
| N-terminal Pro-B type natriuretic peptide (pg/ml) | 10213.3±10970.8 | 8672.5±10681.0   | <0.001 |
| Brain natriuretic peptide (pg/ml)                 | 1392.8±1378.2   | 1305.0±1256.2    | 0.124  |
| High-sensitivity C-reactive protein (mg/dL)       | 2.6±4.6         | 2.1±3.9          | 0.002  |
| Troponin-I (ng/mL)                                | 3.0±15.7        | 2.8±22.3         | 0.722  |

Values are mean±SD or n (%). DM, diabetes mellitus.

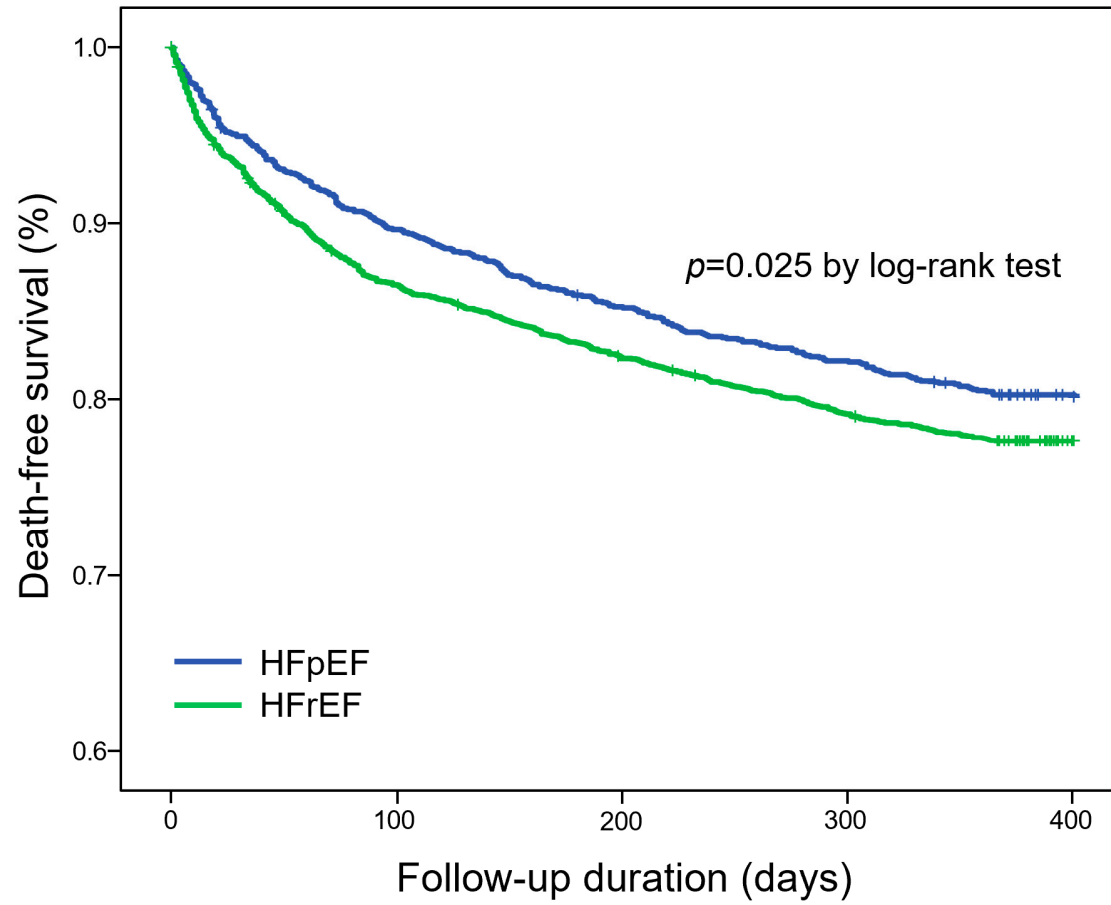

Figure S1
